# Supplementary material
Source: PubMed Central journal article supplement (PMC1266092)

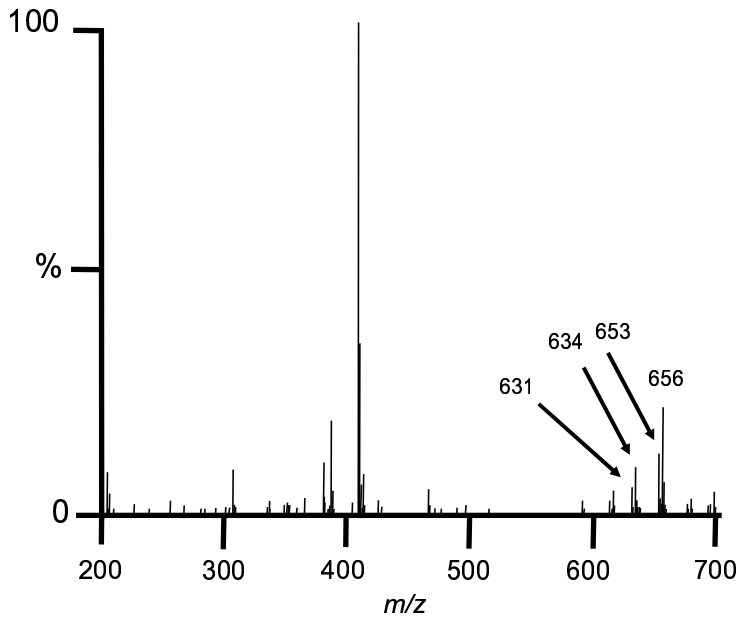

**B**

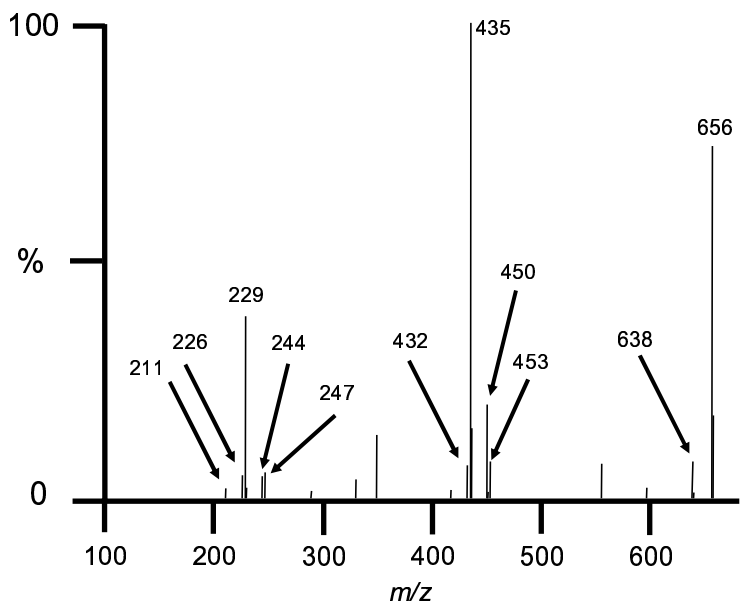

Supplement: pnas_0504339102_1.pdf [file pnas_0504339102_1.pdf]
